# Supplementary material
Source: PubMed Central journal article supplement (PMC8789949)
Supplement: NIHMS1727903-supplement-4.pdf [file NIHMS1727903-supplement-4.pdf]

**Supplemental Table 1: Average Annual Percent Change (AAPC) by age and select variables, 2001-2016<sup>a</sup>**

| Age (years) | Total        | Sex          |              | Race/Ethnicity |              |              |              | Anatomic Site |              |              | Stage        |              |              |
|-------------|--------------|--------------|--------------|----------------|--------------|--------------|--------------|---------------|--------------|--------------|--------------|--------------|--------------|
|             |              | Male         | Female       | White          | Black        | API          | Hispanic     | Proximal      | Distal       | Rectal       | Localized    | Regional     | Distal       |
| 20-29       | <b>0.93</b>  | <b>0.82</b>  | <b>1.08</b>  | <b>0.86</b>    | 1.08         | 0.20         | <b>4.52</b>  | -0.36         | <b>1.07</b>  | <b>1.65</b>  | <b>1.29</b>  | 0.09         | <b>1.85</b>  |
| 30-39       | <b>1.55</b>  | <b>1.50</b>  | <b>1.61</b>  | <b>1.70</b>    | 1.73         | 0.08         | <b>1.60</b>  | <b>0.56</b>   | <b>1.91</b>  | <b>1.93</b>  | 1.55         | <b>1.25</b>  | <b>3.34</b>  |
| 40-44       | <b>1.65</b>  | <b>1.56</b>  | <b>1.51</b>  | <b>1.73</b>    | -0.25        | 0.18         | <b>1.17</b>  | 0.55          | <b>1.72</b>  | <b>1.80</b>  | 0.85         | <b>1.82</b>  | <b>2.78</b>  |
| 45-49       | <b>0.92</b>  | <b>1.14</b>  | <b>0.76</b>  | <b>1.27</b>    | -0.34        | 0.12         | 0.15         | 0.05          | <b>0.87</b>  | <b>1.50</b>  | 0.10         | <b>0.96</b>  | <b>2.39</b>  |
| 50-54       | <b>0.81</b>  | <b>0.61</b>  | <b>0.92</b>  | <b>0.72</b>    | 0.43         | <b>0.98</b>  | <b>1.18</b>  | <b>-0.49</b>  | 0.62         | <b>1.74</b>  | <b>1.57</b>  | -0.03        | <b>0.93</b>  |
| 55-59       | <b>-1.64</b> | <b>-1.59</b> | <b>-1.78</b> | <b>-1.79</b>   | <b>-2.26</b> | <b>-1.41</b> | <b>-1.42</b> | <b>-2.02</b>  | <b>-2.02</b> | <b>-0.83</b> | <b>-1.66</b> | <b>-2.27</b> | <b>-0.49</b> |
| 60-64       | <b>-2.95</b> | <b>-3.15</b> | <b>-2.88</b> | <b>-3.17</b>   | <b>-2.76</b> | <b>-1.35</b> | <b>-1.92</b> | <b>-2.99</b>  | <b>-3.70</b> | <b>-2.18</b> | <b>-2.74</b> | <b>-3.56</b> | <b>-1.70</b> |
| 65-69       | <b>-3.78</b> | <b>-3.93</b> | <b>-3.63</b> | <b>-3.98</b>   | <b>-2.72</b> | <b>-3.01</b> | <b>-2.40</b> | <b>-3.21</b>  | <b>-4.92</b> | <b>-3.51</b> | <b>-3.68</b> | <b>-4.26</b> | <b>-2.62</b> |
| 70-74       | <b>-4.29</b> | <b>-4.48</b> | <b>-4.14</b> | <b>-4.41</b>   | <b>-3.66</b> | <b>-3.89</b> | <b>-3.32</b> | <b>-3.46</b>  | <b>-5.76</b> | <b>-4.21</b> | <b>-3.97</b> | <b>-5.07</b> | <b>-2.78</b> |

Abbreviation: API, Asian/Pacific Islander

<sup>a</sup> Values in bold are statistically significantly different from zero ( $P < 0.05$ )

**Supplemental Table 2:** Average Annual Percent Change (AAPC) for early-onset colorectal cancer by select variables and race/ethnicity, 2001-2016<sup>a</sup>

|                      | Race/Ethnicity |              |             |             |
|----------------------|----------------|--------------|-------------|-------------|
|                      | White          | Black        | API         | Hispanic    |
| <b>Anatomic site</b> |                |              |             |             |
| Proximal             | <b>0.27</b>    | -0.15        | -0.50       | 0.97        |
| Distal               | <b>1.70</b>    | -0.25        | -0.13       | 0.65        |
| Rectum               | <b>1.87</b>    | 0.44         | <b>0.66</b> | <b>0.81</b> |
| <b>Region</b>        |                |              |             |             |
| Northeast            | <b>1.21</b>    | 0.69         | 0.47        | -0.34       |
| Midwest              | <b>1.63</b>    | 0.55         | 1.22        | 0.50        |
| South                | <b>1.40</b>    | <b>-0.42</b> | 0.43        | -0.12       |
| West                 | <b>1.83</b>    | 0.01         | -0.08       | <b>1.64</b> |

Abbreviation: API, Asian/Pacific Islander

<sup>a</sup> Values in bold are statistically significantly different from zero ( $P < 0.05$ )
